# Supplementary material
Source: HighWire-hosted journal article supplement (https://www.cmajopen.ca/highwire/filestream/89063/field_highwire_adjunct_files/3/open-2021-0273-original-submission.pdf)
Supplement: open-2021-0273-original-submission.pdf [file open-2021-0273-original-submission.pdf]

## COVID-19 vaccine uptake and reasons for hesitancy in Canadian pregnant individuals

Anthony Atallah MD, PhD<sup>1,2,3</sup>, Jessica Gorgui MSc<sup>4,5</sup>, Isabelle Boucoiran MD<sup>1,6,7</sup>,

Yessica-Haydee Gomez MSc<sup>4</sup>, Anick Bérard PhD<sup>4,5,7\*</sup>, and the CONCEPTION Study Group

1. Mother and Children's Infectious Diseases Center, Centre Hospitalier Universitaire Sainte-Justine, University of Montréal, Montréal, Québec, Canada.
2. Hospices Civils de Lyon, Hôpital Femme Mère Enfant, Department of Prenatal Diagnosis, University Claude Bernard Lyon 1, France
3. Department of Obstetrics and Gynecology, University of Montréal, Montréal, Québec, Canada
4. Research Center, Centre Hospitalier Universitaire Ste-Justine, Montreal, Quebec, Canada
5. Faculty of Pharmacy, University of Montreal, Montreal, Quebec, Canada;
6. School of Public Health, University of Montréal, Montréal, Québec, Canada
7. Faculty of Medicine, Université Claude Bernard Lyon 1, Lyon, France;

+ **Co-first authors**

\***Corresponding Author:** Dr. Anick Bérard PhD FISPE,

e-mail: [anick.berard@umontreal.ca](mailto:anick.berard@umontreal.ca)

**Funding statement:** This work was supported by grant no. 30962 of the Fonds de recherche du Québec–Santé (FRQS) granted to Dr Anick Bérard; and by a grant from the Cercle du Doyen of the Faculty of Pharmacy, University of Montreal granted to Dr Anick Bérard.

**Declaration of authors competing interests:** None to declare.

**Acknowledgement:** The authors wish to thank the participants of the CONCEPTION study.

**Key words:** COVID-19 Vaccine prevalence, COVID-19 vaccine hesitancy, Pregnancy, Perceived risk

**Word account:** Abstract: 248; Text: 2500; Tables: 3; Figure: 3; Supplement files: Figure: 1, Table 1.

## Abstract

**Background:** With vaccines now recommended to pregnant persons, our aim was to quantify vaccination uptake, describe hesitancy levels and behavioral attitudes surrounding the COVID-19 vaccine in pregnancy in Canada.

**Methods:** The CONCEPTION study is an on-going international study started in June 2020, looking at the impact of the COVID-19 pandemic on the health of pregnant persons and their children. For this study, pregnant persons recruited from 03/15-07/25/2021, and residing in Canada were eligible. In addition to all CONCEPTION variables, data on vaccine uptake as well as personal knowledge of COVID-19 severity in pregnancy and of COVID-19 vaccine safety and efficacy were collected. Determinants of COVID-19 vaccination during pregnancy were identified using logistic regression models.

**Results:** From 03/15/2021-07/25/2021, 485 pregnant women were recruited and gave consent, of which 79.4% (385) were vaccinated, 6.4% (31) had the intention to get vaccinated and 14.2% (69) refused the vaccination. Uptake of the influenza vaccine in 2020-2021 was a significant predictor of COVID-19 vaccination status or intention to be vaccinated (aOR 3.03, 95%CI 1.56-6.33); living in suburban compared to rural areas (aORs 2.84, 95%CI 1.20-6.65), and being employed (aOR 3.66, 95%CI 1.67-7.81) were increasing the likelihood of being vaccinated for COVID-19. Knowledge of COVID-19 severity and COVID-19 vaccine efficacy in pregnancy were positively associated with vaccine uptake.

**Interpretation:** The current study shows that most Canadian pregnant persons are willing to get vaccinated against COVID-19. However, it underscores the importance of improving knowledge transfer of COVID-19 vaccines efficacy in pregnancy to guide vaccination efforts.

## Introduction

To date, the Severe Acute Respiratory Syndrome Coronavirus 2 (SARS-CoV-2) pandemic has led to devastating societal impacts. Several COVID-19 vaccines have emerged and been approved at an unparalleled speed, while maintaining rigorous regulatory processes.(1-4) There is limited data available on the efficacy of COVID-19 vaccines in pregnancy, mostly due to the fact that pregnant persons were excluded from preauthorization clinical trials, and only limited human data on safety during pregnancy were available at the time of authorization. However, we know that pregnant persons with COVID-19 are at increased risk for severe illness (e.g., resulting in admission to an intensive care unit (ICU), extracorporeal membrane oxygenation, or mechanical ventilation) and death, as compared with non-pregnant persons of reproductive age.(5) In a recent systematic review, preterm birth was 3 times more common in individuals with COVID-19 than those uninfected.(6) Moreover, the rate of stillbirths was reportedly 2- to-3 times higher among pregnant persons compared to the pre-pandemic period.(6) Following the PREVENT working group recommendations,(5) both the Society for Maternal-Fetal Medicine and other women's health organizations have included pregnancy as a risk factor for severe COVID-19.

Thus far, the vaccines appear to be equally effective in pregnant and non-pregnant individuals.(7) Indeed, data from developmental and reproductive toxicity animal-model studies for the Pfizer-BioNtech, Moderna, and Janssen (Johnson & Johnson) COVID-19 vaccines did not demonstrate any safety concerns in pregnancy,(7, 8) and efficacy data of the Pfizer-BioNtech and Moderna vaccines in pregnancy showed that no fully vaccinated pregnant persons were admitted to ICUs between 01/02/2021 when vaccination data collection commenced and 07/11/2021.(9)

On April 20<sup>th</sup>, 2021, the Society of Obstetricians and Gynecologists of Canada (SOGC) declared supporting the use of all available COVID-19 vaccines approved in Canada in any

1  
2  
3 trimester of pregnancy. (10) Recommendations for COVID-19 vaccination in pregnant  
4 individuals were further revised and approved on May 13<sup>th</sup>, 2021 by authorities, (11) and the  
5 SOGC statement related to vaccination in Canada was later updated on May 25<sup>th</sup> 2021  
6 approving COVID-19 vaccine in pregnant individuals.(8) The Comité d'immunisation du  
7 Québec later recommended that the messenger RNA vaccines such as those from Moderna or  
8 Pfizer-BioNtech should be preferred for pregnant women as there is more safety data with these  
9 vaccines during pregnancy.(12)

10  
11  
12 Data on COVID-19 vaccine acceptance among pregnant individuals are critical, as vaccine  
13 hesitancy is a major threat to global health described by the World Health Organization  
14 (WHO).(13) Vaccine acceptance has been shown to depend on several factors, such as  
15 sociodemographic characteristics, confidence in vaccine safety and efficacy, available  
16 information on disease severity, as well as trust in the health system and healthcare providers.(8,  
17 14-17) Additionally, the KFF COVID-19 Vaccine Monitor report noticed that about 27% of the  
18 public would probably not or definitely would not get a COVID-19 vaccine if available.(18) As  
19 of July 2021, the two age brackets with the lowest vaccination rate among Canadian adult  
20 females are the 18-29 and 30-39 years old (73% and 76% of one dose vaccination,  
21 respectively),(19) which would include the majority of persons of childbearing age.

22  
23  
24 In the context of this pandemic, we aimed to quantify vaccine uptake in pregnancy, and describe  
25 the level of and reasons for hesitancy and behavioral attitudes surrounding the COVID-19  
26 vaccine among pregnant persons in Canada.  
27  
28  
29  
30  
31  
32  
33  
34  
35  
36  
37  
38  
39  
40  
41  
42  
43  
44  
45  
46  
47  
48  
49  
50  
51  
52  
53  
54  
55  
56  
57  
58  
59  
60

## Methods

### Study Design and Cohort

The CONCEPTION cohort started on June-26<sup>th</sup>, 2020 and is on-going. Since March 2021, CONCEPTION started collecting data on vaccine uptake prevalence, side effects, and vaccine hesitancy. The study obtains patient consent and collects data online using SurveyMonkey®, which is a secure platform that enabled recruitment worldwide, and facilitates the validation of double entry/participation by deleting questionnaires filled using the same IP address. Recruitment uses diverse methodologies based on the WHO's recent efforts to reach younger persons where they get their information, namely social media. Recruitment is done on social media, on the Internet but also through OB/GYN departments across Canada. Furthermore, recruitment is done in-person across Canada in community associations of recent immigrants, which allows for the recruitment of women from lower socio-economic status; computer terminals are also made available to pregnant women in all clinics where in-person recruitment is done. Finally, Quick Response (QR) codes are displayed on posters where in-person recruitment is done, in order for women to directly access the questionnaire with their mobile device, without having to be members of any of the social media platforms. Our study is by far the most representative of all studies performed in pregnant women during the COVID-19 pandemic(8, 15, 18, 20) With regards to our Web-based recruitment of pregnant women, it uses a combination of social media platforms (Facebook, Instagram, Twitter, Linkden, and TikTok). Recruitment strategies and data intake questionnaires are available in French, English, Spanish, Portuguese, and Mandarin, and postings are refreshed daily. Development of the questionnaire was done in English; translated in all other languages afterwards; and back translated in English to ensure validity. In order to reach the most diverse group of pregnant women, two team members (JG, YHG) actively work on promoting the cohort on social media platforms via information segments (all platforms), mother/child and pregnancy support groups, and

1  
2  
3 outpatient and community clinics, established hashtag strategies (Instagram, Twitter,  
4  
5 LinkedIn), and through communication specialists affiliated with our team's respective  
6  
7 universities. Social media combined with in-person recruitment in times of crises are  
8  
9 appropriate methodologies given the rapidity with which we need answers to pressing  
10  
11 questions, such as how are pregnant women doing during the COVID-19 pandemic. Social  
12  
13 media recruitment with anonymized data (survey, cross-sectional samples) has been used in  
14  
15 other similar studies.(8, 20, 21) Of all the studies published on this topic thus far, the  
16  
17 CONCEPTION study is the only one that collects non-anonymized data. Our study is still  
18  
19 recruiting pregnant women, and collects longitudinal data.  
20  
21  
22

23  
24 Study eligibility, consent, and baseline data collection are completed electronically; the  
25  
26 information is thereafter downloaded on a secure server at CHU Sainte-Justine, Montreal,  
27  
28 Quebec. All data collected are in a centralized database at CHU Ste-Justine in Montreal,  
29  
30 Quebec, Canada. The consent obtained from study subjects does not include open access.  
31  
32

33  
34 For this study on COVID-19 vaccination, participants had to be recruited in the  
35  
36 CONCEPTION study after March 15, 2021; be pregnant, and reside in Canada at the time of  
37  
38 recruitment; they also had to be 18 years or older, and able to read French, English, Spanish,  
39  
40 Portuguese or Mandarin.  
41

#### 42 **Study variables:**

43  
44 A) Maternal characteristics and physical health (history and since the first day of pregnancy):  
45  
46 1) age, gestational age, pre-pregnancy weight, ethnicity; 2) socio-demographic characteristics:  
47  
48 education, household annual income, and marital status, place of residence (urban, rural),  
49  
50 current employment status (type of work, working from home, still working on-site and at  
51  
52 which frequency); 3) lifestyles during pregnancy including smoking, multivitamin use; 4)  
53  
54 health status and medication use such as prescribed medication use, comorbidity history  
55  
56  
57  
58  
59  
60

1  
2  
3 (asthma, hypertension, diabetes, hyperthyroidism, hypothyroidism, dyslipidemia, depression,  
4 anxiety); 5) pregnancy history including parity; 6) COVID-19 diagnoses or symptoms.

7  
8 B) Vaccine variables: Participants were asked whether they had been vaccinated against  
9 COVID-19 since the beginning of their pregnancy, and when they received the vaccine  
10 (gestational age); which vaccine and how many doses they had received; as well as the side  
11 effects were reported. Participants were also asked whether they had received the influenza  
12 vaccine during the 2020-2021 season, which was analysed as a proxy for pre-pandemic public  
13 health measures. Additionally, participants were questioned about their knowledge on COVID-  
14 19 severity in pregnancy and on the safety and efficacy of the COVID-19 vaccine in general  
15 and in pregnancy specifically; acceptability of the COVID-19 vaccine administration during  
16 pregnancy was measured using a Likert scales ranging from 1 (no knowledge) to 5 (excellent  
17 knowledge). Each participant was further asked about their personal history of COVID-19  
18 disease. Finally, in case of vaccine refusal, the participant documented the reason(s) for their  
19 decision.  
20  
21  
22  
23  
24  
25  
26  
27  
28  
29  
30  
31  
32  
33

34  
35 The questionnaire was pretested with 10 French-speaking and 10 English-speaking pregnant  
36 persons and took an average of 25 minutes to complete.  
37  
38

39  
40 This study was approved by the CHU Ste-Justine's Research Ethics Committee (Institutional  
41 ethical review approval number: #2021-2973).  
42  
43  
44

#### 45 **Data analyses**

46  
47 Comparisons were performed according to vaccination status and intention (vaccinated,  
48 intention to be vaccinated, no intention to be vaccinated). For all variables, comparisons using  
49 means with standard deviations or proportions with ranges were performed, depending on  
50 whether the variables were continuous or categorical, using one-way ANOVA or chi-square  
51 statistics.  
52  
53  
54  
55  
56  
57  
58  
59  
60

1  
2  
3 We quantified the determinants of COVID-19 vaccination or intention to be vaccinated during  
4 pregnancy with crude and adjusted logistic regression models, considering maternal age, annual  
5 household income and years of education. Persons that expressed their intention to get  
6 vaccinated were considered in the vaccinated group for multivariate statistical analyses. Odds  
7 ratios (ORs) and 95% confidence intervals (CIs) were calculated. All statistical analyses were  
8 performed using R Statistical Software (version 4.1.0).  
9  
10  
11  
12  
13  
14  
15  
16  
17  
18  
19  
20  
21  
22  
23  
24  
25  
26  
27  
28  
29  
30  
31  
32  
33  
34  
35  
36  
37  
38  
39  
40  
41  
42  
43  
44  
45  
46  
47  
48  
49  
50  
51  
52  
53  
54  
55  
56  
57  
58  
59  
60

Confidential



## Results

We recruited 556 participants into CONCEPTION from March 15<sup>th</sup> to July 25<sup>th</sup>, 2021 (**Figure 1**). Among these participants, 31 exited before providing consent, 1 refused consent, and 39 exited the survey without answering the sociodemographic questions. A total of 485 participants were considered for analysis, of which 79.38% (385/485) were vaccinated, 6.39% (31/485) had the intention to get vaccinated, and 14.22% (69/485) refused the vaccination. Among those who received the COVID-19 vaccines (n, 385), the majority had the Pfizer-BioNtech vaccine (311, 80.78%), and close to 50% already had received the 2 doses (50.48% Pfizer-BioNtech, 47.30% Moderna) (**Supplementary Table ST1**). The majority of those vaccinated at the time of recruitment were in their second or third trimester of pregnancy (93.54%, Table 1). Reported side effects among vaccinated participants were pain and swelling at injection site, tiredness, and headache, which were both observed more frequently following the second dose (**Supplementary Figure SF1**).

### Population characteristics

Participants were on average  $33.00 \pm 4.06$  (Standard deviation, SD) years old at recruitment (Table 1). The mean gestational age at inclusion was  $22.94 \pm 9.22$  (SD) gestational weeks. Analyses revealed significant statistical differences in maternal and gestational age at inclusion according to vaccination status. Vaccinated individuals were recruited earlier in their pregnancy than non-vaccinated participants (22.33 weeks gestation (WG) vs. 26.87 WG,  $p < .001$ ) (Table 1). The prevalence of influenza vaccination for the 2020-2021 season was significantly higher among COVID-19-vaccinated individuals (42.60%) compared with individuals intending to be vaccinated or not vaccinated (22.58% and 15.94%, respectively,  $p < 0.001$ ). Furthermore, vaccinated individuals were more educated compared to those intending to be vaccinated or non-vaccinated participants (17.65 years vs. 16.02 and 14.67 years, respectively,  $p < 0.001$ ).

Vaccinated pregnant persons also had higher annual family income than the other 2 study groups ( $p < 0.001$ ) (**Table 1**).

### **Personal knowledge assessment of COVID-19 and predictors of vaccination status**

Personal knowledge of COVID-19 severity in pregnancy was stratified by vaccination status and presented in **Figure 2A**. Vaccinated participants or those intending to get vaccinated reported a higher prevalence of good (4/5) or excellent knowledge (5/5) on COVID-19 severity in pregnancy than participants refusing the vaccine.

When considering personal knowledge assessment of COVID-19 vaccination in general (**Figure 2B**), vaccine acceptance differed in those with a reported good (4/5) knowledge (44.95% acceptance vs 36.23% refusal), while remaining largely similar in others (knowledge of 2-3-5/5). Furthermore, **Figure 2C** shows that vaccination acceptance did not vary significantly according to self-assessment level of personal knowledge of COVID-19 vaccination in pregnancy.

Personal experiences with COVID-19 stratified by vaccination status are shown in **Table 2**. Despite the absence of statistical significance, vaccinated participants reported more frequent COVID-19 testings.

Reception of an influenza vaccine within the most recent flu season was considered a significant predictor of vaccination status or intention to be vaccinated (adjusted odds ratio (aOR) 3.03, 95% CI 1.56-6.33) (**Table 3**). Area of residence (suburban area) and employment status were significantly associated with vaccination status after adjustment for the other predictors (**Table 3**). Self-assessment of knowledge of the COVID-19 vaccine in general was not a significant predictor of vaccination status or intention to be vaccinated, regardless of the level of self-assigned personal knowledge. However, controlling for maternal age, years of education, and annual household income, self-estimated knowledge of COVID-19 severity in pregnancy and

1  
2  
3 knowledge of COVID-19 vaccination in pregnancy were significant predictors of vaccination  
4 status (**Table 3**). The more personal knowledge a participant believed they had; the more  
5 participants were likely to accept vaccination (**Table 3**).  
6  
7

8  
9  
10 The main reasons stated for refusal of COVID-19 vaccines were lack of safety and efficacy data  
11 in pregnancy, the speed of vaccine creation and approval, as well as lack of information on  
12 vaccines in pregnancy (**Figure 3**). Submitted personal reasons for refusal included incomplete  
13 clinical trials and adverse outcomes with fertility and pregnancy, which highlights the impact  
14 of misinformation. Respondents also stated that public health, their obstetrician, family doctor  
15 and/or doula had advised against vaccination (**Figure 3**).  
16  
17  
18  
19  
20  
21  
22  
23  
24  
25  
26  
27  
28  
29  
30  
31  
32  
33  
34  
35  
36  
37  
38  
39  
40  
41  
42  
43  
44  
45  
46  
47  
48  
49  
50  
51  
52  
53  
54  
55  
56  
57  
58  
59  
60

Confidential

## **Interpretation**

### **Main findings**

The present study is the first to report on the COVID-19 vaccine hesitation, and acceptance of COVID-19 vaccination in a sample of pregnant persons in Canada. The majority of pregnant persons included in our study were vaccinated (79.38%), and the Pfizer-BioNtech vaccine was the most frequently used; close to 50% of pregnant participants had received the 2 doses at the time of recruitment. After adjustments for maternal age, years of education and annual household income, self-estimated knowledge of COVID-19 severity in pregnancy, and of COVID-19 vaccination efficacy and safety in pregnancy were significant predictors of vaccination status. Previous influenza vaccination uptake was a significant predictor of COVID-19 vaccination among participants. The main reasons provided among individuals refusing to be vaccinated were lack of safety and efficacy data in pregnancy, and hasty approval of the vaccine. Among vaccinated persons, pain and swelling at the injection sites, tiredness, and headaches were the most frequent reported side effects.

### **Explanation of the findings**

This study emphasizes the impact of educational strategies on behavioral public health determinant. Our finding suggested that the involvement of the patient in the preventive strategy and the knowledge of the benefits and risks of the therapeutic plan generate better compliance and adherence to the personalized care project in accordance with the national public health recommendations. Since women's health authorities have recommended that pregnant persons discuss vaccination decisions with their healthcare providers,(22, 23) these findings underline the need for public health messaging and pedagogical approaches to improve COVID-19 vaccination acceptance adapted to each distinct population. Healthcare providers are the most frequently trusted source of vaccine information and play a key role in shaping maternal

1  
2  
3 attitudes towards vaccination.(24) While COVID-19 vaccine safety education in pregnancy is  
4  
5 essential, our results show that an alternative approach may be necessary to increase COVID-  
6  
7 19 vaccine acceptance, especially for those who experience mistrust in the healthcare system.  
8  
9  
10 Influenza vaccination acceptance was considered a predictor of COVID-19 vaccination among  
11  
12 the participants. Indeed, the refusal group reported lower influenza vaccination during the  
13  
14 previous flu season. This result is consistent with vaccine hesitancy, a growing problem in  
15  
16 public health over the last decade.(25) In Canada, a vaccination survey tracks every 2 years  
17  
18 coverage for all vaccines recommended by the National Advisory Committee on Immunization.  
19  
20  
21 Among pregnant persons, only 45% were vaccinated against the flu, 44% against pertussis, and  
22  
23 3 to 10% of mothers did not know if they had been vaccinated.(26) With a prevalence of  
24  
25 COVID-19 vaccine of 79.38% in addition to 6.39% who accept vaccination but hadn't yet and  
26  
27 a prevalence of flu vaccination of 37.53%, our reported vaccination acceptance is consistent  
28  
29 with Canadian and international observations.(27, 28) This said, in a report by BORN Ontario,  
30  
31 they reported a vaccination rate among pregnant persons of 23.9% between December 14<sup>th</sup> 2020  
32  
33 and May 31<sup>st</sup> 2021.(29) This discrepancy with our results stems from the fact that vaccination  
34  
35 rolled out at different times in Canada, with earlier access granted to pregnant persons in Quebec  
36  
37 compared to Ontario.  
38  
39  
40

41  
42 Underestimation of vaccine efficacy and lack of trust were previously reported as two main  
43  
44 reasons for vaccine hesitancy.(30, 31) In our study, mistrust of the vaccine safety and efficacy  
45  
46 were the most frequent reasons for vaccine refusal. The population expressing a vaccination  
47  
48 refusal denounced a precipitous approval of vaccines, which denotes a lack of understanding of  
49  
50 the approval process, lack of confidence in the procedures for validating vaccination in pregnant  
51  
52 individuals, and a mistrust of national recommendations. The exclusion of pregnant individuals  
53  
54 from vaccine safety trials(32) did not prevent the Society of Obstetricians and Gynecologists  
55  
56 of Canada recommending the use of the COVID-19 vaccine for pregnant persons.(8) A recent  
57  
58  
59  
60

1  
2  
3 surveillance review of the safety of mRNA COVID-19 vaccines during pregnancy indicated no  
4 significant outcome among pregnant persons who received the vaccine.(33) Vaccine refusal  
5 associated with a good to excellent self-assessment of knowledge level highlights the priority  
6 to answer remaining knowledge gaps and confront the existing misinformation towards  
7 COVID-19 vaccine. Indeed, while the vaccine validation trials were completed and many  
8 studies have provided reassuring COVID-19 vaccine safety data,(1, 33, 34) many patients  
9 mentioned inconsistent arguments to justify their vaccine hesitation, which may denote the  
10 limited access to evidence-based medicine in a constantly evolving and learning science.  
11  
12  
13  
14  
15  
16  
17  
18  
19  
20

### 21 **Strengths and limitations**

22  
23  
24 This study has several strengths, including a well-established recruitment strategy tailored to  
25 our study population and a significant sample size. Additionally, the study was ready for  
26 recruitment at the same time as vaccination approvals for pregnant persons. Data intake was  
27 performed electronically, which allowed us to collect data in real-time. We ensured the quality  
28 of data through complete data cataloguing. Limitations of the study include enrollment, in part,  
29 through social media which may limit generalizability to those less familiar with social media  
30 and exclude those with lower socioeconomic status. However, the 2018 Canadian Internet Use  
31 Survey showed that more than 80% of Canadian adults aged 18-44 years old use social media  
32 regularly (and >90% adults between 18-34 years old), women predominantly.(35) We  
33 acknowledge that the study design may have biased the selection of participants, preferentially  
34 recruiting individuals who were interested in the topic or favorable to vaccination and who are  
35 more concerned with COVID-19, however our methods did not target influencers or news  
36 sources who are necessarily pro-vaccination more than others. Also, the multivariate analysis  
37 combined into a same group, individuals who were vaccinated with those who intended to be  
38 vaccinated. This was done as recruitment began the same week as vaccination was open to  
39  
40  
41  
42  
43  
44  
45  
46  
47  
48  
49  
50  
51  
52  
53  
54  
55  
56  
57  
58  
59  
60

1  
2  
3 pregnant persons in the province of Quebec and because a majority of those intending to be  
4 vaccinated completed the survey prior to their scheduled vaccination appointment.  
5  
6

7 Our study described the vaccine acceptance rate around the time that the mRNA vaccines were  
8 promoted. Given that the primary concern was safety, this acceptance rate may change over  
9 time as more data are accrued.  
10  
11  
12  
13  
14  
15  
16  
17  
18  
19  
20  
21  
22

### 23 **Conclusion and future directions**

24 To date, no study has provided strong evidence of fetal and neonatal safety with the COVID-  
25 19 vaccine.[24] While prolonged monitoring is needed to evaluate late-onset neonatal and  
26 childhood outcomes associated with maternal COVID-19 vaccination, vaccination against  
27 COVID-19 in pregnancy is vital to controlling disease burden and decreasing morbidity in  
28 pregnancy. As vaccine efficacy ranges between 70 and more than 90% for severe disease and  
29 COVID-19-related-hospitalization prevention,(36) we are increasingly facing a “pandemic of  
30 the unvaccinated”, as warned by the Pan American Health Organization. Given the economic,  
31 political, social and industrial repercussions, it seems essential to consider the epidemiological  
32 factors influencing vaccine acceptance and prioritize their impact in public health and  
33 knowledge translation strategies. This study underscored the importance of adapted educational  
34 approaches to guide public health and research efforts, as a key to improve vaccine acceptance  
35 in pregnant individuals.  
36  
37  
38  
39  
40  
41  
42  
43  
44  
45  
46  
47  
48  
49  
50  
51  
52  
53  
54  
55  
56  
57  
58  
59  
60

### Contributor statement

AA and JG wrote the first draft of the manuscript; JG and YHG actively recruited via social media and traditional media; AB obtained funding; AB obtained data as well as ethics approval; JG performed the statistical analyses. All authors wrote the study protocol, interpreted results, and critically reviewed the manuscript.

### List of all CONCEPTION investigators

Anick Bérard<sup>1,2,3\*</sup>, Anaïs Lacasse<sup>4</sup>, Yessica-Haydee Gomez<sup>2</sup>, Jessica Gorgui<sup>1,2</sup>, Sylvana Côté<sup>2,5</sup>, Suzanne King<sup>6</sup>, Vanina Tchunte<sup>2</sup>, Flory Muanda<sup>7</sup>, Yves Mufike Mufike<sup>8</sup>, Isabelle Boucoiran<sup>2,9</sup>, Anne Monique Nuyt<sup>2,10</sup>, Caroline Quach<sup>2,11</sup>, Ema Ferreira<sup>1,12</sup>, Padma Kaul<sup>13</sup>, Brandace Winqvist<sup>14</sup>, Kieran O'Donnell<sup>15</sup>, Sherif Eltonsy<sup>16</sup>, Dan Chateau<sup>17</sup>, Jin-Ping Zhao<sup>2</sup>, Gillian Hanley<sup>18</sup>, Tim Oberlander<sup>19</sup>, Behrouz Kassai<sup>20</sup>, Sabine Mainbourg<sup>3</sup>, Sasha Bernatsky<sup>21</sup>, Évelyne Vinet<sup>21</sup>, Annie Brodeur-Doucet<sup>22</sup>, Jackie Demers<sup>22</sup>, Philippe Richebé<sup>23</sup>, Valerie Zaphiratos<sup>24</sup>, Chongjian Wang<sup>25</sup>, Xian Wang<sup>25</sup>

<sup>1</sup>Faculty of Pharmacy, University of Montreal, Montreal, Quebec, Canada

<sup>2</sup>Research Center, CHU Sainte-Justine, Montreal, Quebec, Canada

<sup>3</sup>Faculty of Medicine, Université Claude Bernard Lyon 1, Lyon, France

<sup>4</sup>Health Sciences Department, Université du Québec en Abitibi-Témiscamingue, Rouyn-Noranda, Quebec, Canada

<sup>5</sup>Faculty of Medicine, School of Public Health, University of Montreal, Quebec, Canada

<sup>6</sup>Faculty of Medicine, McGill University, Quebec, Canada

<sup>7</sup>Department of Epidemiology & Biostatistics, Western University, and ICES Western, London, Ontario, Canada

<sup>8</sup>Department of Family Medicine, Protestant University in Congo, Kinshasa, Republic Democratic of Congo



1  
2  
3 <sup>9</sup>School of Public Health and Department of Obstetrics and Gynecology, University of  
4 Montreal, Montreal, Quebec, Canada

5  
6  
7 <sup>10</sup>Department of Pediatrics, University of Montreal and CHU Sainte-Justine, Montreal,  
8 Quebec, Canada

9  
10  
11  
12 <sup>11</sup>Department of Microbiology, Infectious Diseases and Immunology, University of Montreal,  
13 Quebec, Canada

14  
15  
16 <sup>12</sup>Pharmacy Department, CHU Sainte-Justine, Montreal, Quebec, Canada

17  
18  
19 <sup>13</sup>Department of Medicine, University of Alberta, 4-120 Katz Group Centre for Pharmacy and  
20 Health Research, Edmonton, Alberta, Canada

21  
22  
23 <sup>14</sup>College of Medicine, Department of Community Health and Epidemiology, University of  
24 Saskatchewan, Saskatoon, Saskatchewan, Canada

25  
26  
27  
28 <sup>15</sup>Douglas Research Center, Department of Psychiatry, McGill University, Quebec, Canada;  
29 Child and Brain Development Program, CIFAR, Toronto, Ontario, Canada; Yale Child Study  
30 Center and Department of OB/GYN and Reproductive Sciences, Yale School of Medicine,  
31 New Haven, CT, USA

32  
33  
34  
35  
36  
37 <sup>16</sup>College of Pharmacy, Rady Faculty of Health Sciences, University of Manitoba, Winnipeg,  
38 Manitoba, Canada

39  
40  
41  
42 <sup>17</sup>Manitoba Center for Health Policy, Winnipeg, Manitoba, Canada

43  
44  
45  
46  
47 <sup>18</sup>Department of Obstetrics & Gynaecology, University of British Columbia, Vancouver,  
48 British Columbia, Canada

49  
50  
51  
52 <sup>19</sup>Department of Pediatrics, School of Population and Public Health, University of British  
53 Columbia, Vancouver, British Columbia, Canada

54  
55  
56  
57 <sup>20</sup>Department of Clinical Epidemiology, UMR 5558 CNRS, Claude Bernard University Lyon  
58 1, Clinical Investigation Centre, Inserm-Hospices Civils de Lyon, Lyon, France

1  
2  
3 <sup>21</sup>Divisions of Clinical Epidemiology and Rheumatology, McGill University Health Centre,  
4  
5 Montreal, Quebec, Canada  
6

7 <sup>22</sup>Dispensaire diététique de Montréal/Montreal Diet Dispensary, Montreal, Quebec, Canada  
8

9 <sup>23</sup>Department of Anesthesiology and Pain Medicine, CIUSSS de l'Est de l'Ile de Montreal,  
10  
11  
12  
13  
14  
15  
16  
17  
18  
19  
20  
21  
22  
23  
24  
25  
26  
27  
28  
29  
30  
31  
32  
33  
34  
35  
36  
37  
38  
39  
40  
41  
42  
43  
44  
45  
46  
47  
48  
49  
50  
51  
52  
53  
54  
55  
56  
57  
58  
59  
60  
Maisonneuve-Rosemont Hospital, University of Montreal, Montreal, Quebec, Canada

<sup>24</sup>Research Center, Maisonneuve-Rosemont Hospital, CIUSSS de l'Est de l'Ile de Montreal,  
Montreal, Quebec, Canada

<sup>25</sup>College of Public Health, Zhengzhou University, Zhengzhou, Henan, China

Confidential

## References

1. Polack FP, Thomas SJ, Kitchin N, Absalon J, Gurtman A, Lockhart S, et al. Safety and Efficacy of the BNT162b2 mRNA Covid-19 Vaccine. *N Engl J Med.* 2020;383(27):2603-15.
2. Knoll MD, Wonodi C. Oxford-AstraZeneca COVID-19 vaccine efficacy. *Lancet.* 2021;397(10269):72-4.
3. Mahase E. Covid-19: Moderna applies for US and EU approval as vaccine trial reports 94.1% efficacy. *BMJ.* 2020;371:m4709.
4. Meo SA, Bukhari IA, Akram J, Meo AS, Klonoff DC. COVID-19 vaccines: comparison of biological, pharmacological characteristics and adverse effects of Pfizer/BioNTech and Moderna Vaccines. *Eur Rev Med Pharmacol Sci.* 2021;25(3):1663-9.
5. Krubiner CB, Faden RR, Karron RA, Little MO, Lyerly AD, Abramson JS, et al. Pregnant women & vaccines against emerging epidemic threats: Ethics guidance for preparedness, research, and response. *Vaccine.* 2021;39(1):85-120.
6. Zambrano LD, Ellington S, Strid P, Galang RR, Oduyebo T, Tong VT, et al. Update: Characteristics of Symptomatic Women of Reproductive Age with Laboratory-Confirmed SARS-CoV-2 Infection by Pregnancy Status - United States, January 22-October 3, 2020. *MMWR Morb Mortal Wkly Rep.* 2020;69(44):1641-7.
7. Gynecologists ACoOa. COVID-19 Vaccines and Pregnancy: Conversation Guide for Clinicians 2021 [August 6th 2021]. Available from: <https://www.acog.org/-/media/project/acog/acogorg/files/pdfs/clinical-guidance/practice-advisory/covid19vaccine-conversationguide-121520-v2.pdf?la=en&hash=439FFEC1991B7DD3925352A5308C7C42>.
8. Poliquin V C BI, Watson H, Yudin M, Money D, Van Schalkwyk J, Elwood S SOGC Statement on COVID-19 Vaccination in Pregnancy, On behalf of the Infectious Disease Committee of the Society of Obstetricians and Gynaecologists of Canada. 2021 [Available from: [https://sogc.org/common/Uploaded%20files/Latest%20News/SOGC\\_Statement\\_COVID-19\\_Vaccination\\_in\\_Pregnancy.pdf](https://sogc.org/common/Uploaded%20files/Latest%20News/SOGC_Statement_COVID-19_Vaccination_in_Pregnancy.pdf)].
9. Vousden N, Ramakrishnan R, Bunch K, Morris E, Simpson N, Gale C, et al. Impact of SARS-CoV-2 variant on the severity of maternal infection and perinatal outcomes: Data from the UK Obstetric Surveillance System national cohort. *medRxiv.* 2021:2021.07.22.21261000.
10. Canada IDCotSoOaGo. SOGC Statement on the COVID-19 vaccines and rare adverse outcomes of thrombosis associated with low platelets 2021 [Available from: [https://www.sogc.org/en/content/featured-news/SOGC\\_Statement\\_on\\_the\\_COVID-19\\_vaccines\\_and\\_rare\\_adverse\\_outcomes\\_of\\_%20thrombosis.aspx](https://www.sogc.org/en/content/featured-news/SOGC_Statement_on_the_COVID-19_vaccines_and_rare_adverse_outcomes_of_%20thrombosis.aspx)].
11. Canada NACoIo. Recommendations on the use of COVID-19 vaccines - Appendix F: Pregnancy, breastfeeding, and COVID-19 vaccine registries 2021 [Available from: [https://www.canada.ca/en/public-health/services/immunization/national-advisory-committee-on-immunization-naci/recommendations-use-covid-19-vaccines.html#ap\\_f](https://www.canada.ca/en/public-health/services/immunization/national-advisory-committee-on-immunization-naci/recommendations-use-covid-19-vaccines.html#ap_f)].
12. MSSS. COVID-19 ARNm : vaccins à ARN messenger contre la COVID-19 2021 [Available from: <https://www.msss.gouv.qc.ca/professionnels/vaccination/piq-vaccins/covid-19-vaccin-a-arn-messenger-contre-la-covid-19/>].
13. Hesitancy SWGoV. Vaccine Hesitancy Report of the SAGE Working Group on Vaccine Hesitancy. 2014 [Available from: [https://www.who.int/immunization/sage/meetings/2014/october/SAGE\\_working\\_group\\_revised\\_report\\_vaccine\\_hesitancy.pdf](https://www.who.int/immunization/sage/meetings/2014/october/SAGE_working_group_revised_report_vaccine_hesitancy.pdf)].
14. Dudley MZ, Limaye RJ, Omer SB, O'Leary ST, Ellingson MK, Spina CI, et al. Characterizing the vaccine knowledge, attitudes, beliefs, and intentions of pregnant women in Georgia and Colorado. *Hum Vaccin Immunother.* 2020;16(5):1109-17.

15. Fisher KA, Bloomstone SJ, Walder J, Crawford S, Fouayzi H, Mazor KM. Attitudes Toward a Potential SARS-CoV-2 Vaccine : A Survey of U.S. Adults. *Ann Intern Med.* 2020;173(12):964-73.
16. Kilich E, Dada S, Francis MR, Tazare J, Chico RM, Paterson P, et al. Factors that influence vaccination decision-making among pregnant women: A systematic review and meta-analysis. *PLoS One.* 2020;15(7):e0234827.
17. King JP, Hanson KE, Donahue JG, Glanz JM, Klein NP, Naleway AL, et al. Survey of influenza vaccine knowledge, attitudes, and beliefs among pregnant women in the 2016-17 season. *Vaccine.* 2020;38(9):2202-8.
18. Hamel L KA, Muñana C, Brodie M KFF COVID-19 Vaccine Monitor: December 2020 2021 [Available from: <https://www.kff.org/coronavirus-covid-19/report/kff-covid-19-vaccine-monitor-december-2020/>].
19. Canada PHAo. Results of the Survey on Vaccination during Pregnancy. 2020 [Available from: <https://www.canada.ca/en/public-health/services/publications/vaccines-immunization/survey-vaccination-during-pregnancy.html>].
20. Ceulemans M, Foulon V, Ngo E, Panchaud A, Winterfeld U, Pomar L, et al. Mental health status of pregnant and breastfeeding women during the COVID-19 pandemic—A multinational cross-sectional study. *Acta Obstetricia et Gynecologica Scandinavica.* 2021;100(7):1219-29.
21. Kajdy A, Feduniw S, Ajdacka U, Modzelewski J, Baranowska B, Sys D, et al. Risk factors for anxiety and depression among pregnant women during the COVID-19 pandemic: A web-based cross-sectional survey. *Medicine.* 2020;99(30):e21279.
22. American College of Obstetricians and Gynecologists IID, and Public Health Preparedness Expert Work Group in collaboration with Riley LE, Beigi R, Jamieson DJ, et al. Vaccinating pregnant and lactating patients against COVID-19. 2021 [Available from: <https://www.acog.org/en/clinical/clinical-guidance/practice-advisory/articles/2020/12/covid-19-vaccination-considerations-for-obstetric-gynecologic-care>].
23. Medicine SfM-F. Society for Maternal-Fetal Medicine (SMFM) statement: SARS-CoV-2 vaccination in pregnancy 2020 [Available from: [https://s3.amazonaws.com/cdn.smfm.org/media/2591/SMFM\\_Vaccine\\_Statement\\_12-1-20\\_\(final\).pdf](https://s3.amazonaws.com/cdn.smfm.org/media/2591/SMFM_Vaccine_Statement_12-1-20_(final).pdf)].
24. Danchin MH, Costa-Pinto J, Attwell K, Willaby H, Wiley K, Hoq M, et al. Vaccine decision-making begins in pregnancy: Correlation between vaccine concerns, intentions and maternal vaccination with subsequent childhood vaccine uptake. *Vaccine.* 2018;36(44):6473-9.
25. Volkov S WHO. Ten Threats to Global Health in 2019. 2019.
26. Canada PHAo. Demographics: COVID-19 vaccination coverage in Canada 2021 [Available from: <https://health-infobase.canada.ca/covid-19/vaccination-coverage/#a5>].
27. Goncu Ayhan S, Oluklu D, Atalay A, Menekse Beser D, Tanacan A, Moraloglu Tekin O, et al. COVID-19 vaccine acceptance in pregnant women. *Int J Gynaecol Obstet.* 2021;154(2):291-6.
28. Levy AT, Singh S, Riley LE, Prabhu M. Acceptance of COVID-19 vaccination in pregnancy: a survey study. *Am J Obstet Gynecol MFM.* 2021;3(5):100399.
29. Ontario B. COVID-19 Vaccination During Pregnancy in Ontario 2021 [Available from: <https://www.bornontario.ca/en/whats-happening/resources/Documents/COVID-19-Vaccination-During-Pregnancy-in-Ontario-Report-1---FINAL.pdf>].
30. Palamenghi L, Barello S, Boccia S, Graffigna G. Mistrust in biomedical research and vaccine hesitancy: the forefront challenge in the battle against COVID-19 in Italy. *Eur J Epidemiol.* 2020;35(8):785-8.

- 1  
2  
3 31. Prematunge C, Corace K, McCarthy A, Nair RC, Pugsley R, Garber G. Factors  
4 influencing pandemic influenza vaccination of healthcare workers--a systematic review.  
5 *Vaccine*. 2012;30(32):4733-43.  
6  
7 32. LaCourse S, John-Stewart G, Adams Waldorf KM. Importance of Inclusion of Pregnant  
8 and Breastfeeding Women in COVID-19 Therapeutic Trials. *Clin Infect Dis*. 2020;71(15):879-  
9 81.  
10 33. Shimabukuro TT, Kim SY, Myers TR, Moro PL, Oduyebo T, Panagiotakopoulos L, et  
11 al. Preliminary Findings of mRNA Covid-19 Vaccine Safety in Pregnant Persons. *N Engl J*  
12 *Med*. 2021;384(24):2273-82.  
13 34. Male V. Are COVID-19 vaccines safe in pregnancy? *Nat Rev Immunol*.  
14 2021;21(4):200-1.  
15 35. Schimmele C FJ, Schellenberg G. Canadians' assessments of social media in their lives.  
16 2021 [Available from: [https://www150.statcan.gc.ca/n1/pub/36-28-  
17 0001/2021003/article/00004-eng.htm](https://www150.statcan.gc.ca/n1/pub/36-28-0001/2021003/article/00004-eng.htm).  
18  
19 36. Fleming TR, Krause PR, Nason M, Longini IM, Henao-Restrepo AM. COVID-19  
20 vaccine trials: The use of active controls and non-inferiority studies. *Clin Trials*.  
21 2021;18(3):335-42.  
22  
23  
24  
25  
26  
27  
28  
29  
30  
31  
32  
33  
34  
35  
36  
37  
38  
39  
40  
41  
42  
43  
44  
45  
46  
47  
48  
49  
50  
51  
52  
53  
54  
55  
56  
57  
58  
59  
60

Confidential

1  
2  
3  
4  
5  
6  
7  
8  
9  
10  
11  
12  
13  
14  
15  
16  
17  
18  
19  
20  
21  
22  
23  
24  
25  
26  
27  
28  
29  
30  
31  
32  
33  
34  
35  
36  
37  
38  
39  
40  
41  
42  
43  
44  
45  
46  
47  
48  
49  
50  
51  
52  
53  
54  
55  
56  
57  
58  
59  
60

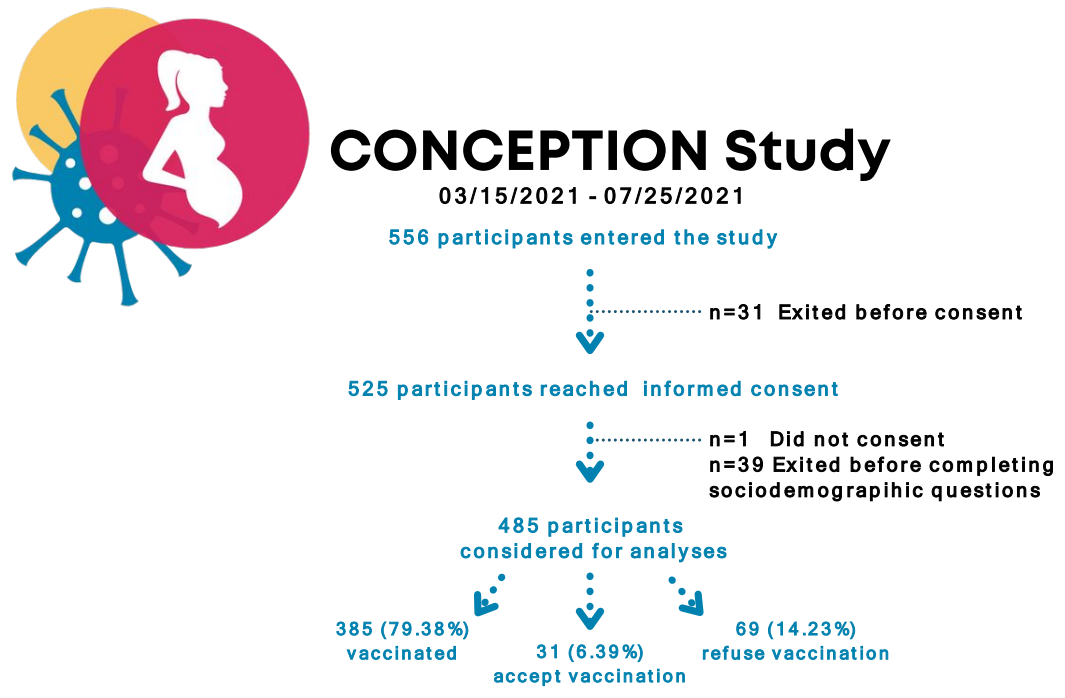

Figure 1. CONCEPTION Study flow-chart.

**Table 1.** Sociodemographics of study participants stratified based on their vaccination status.

|                                                                | Overall n=485 | Vaccination or intention to vaccinate<br>n=416 |                            | Refuse vaccination<br>n=69 | P-value**        |
|----------------------------------------------------------------|---------------|------------------------------------------------|----------------------------|----------------------------|------------------|
|                                                                |               | Vaccinated<br>n=385                            | Accept vaccination<br>n=31 |                            |                  |
| Age, years – mean±SD                                           | 33.00 ± 4.06  | 32.91 ± 3.96                                   | 30.80 ± 4.25               | 33.00 ± 4.33               | <b>&lt;0.001</b> |
| Gestational age, weeks – mean±SD                               | 22.94 ± 9.22  | 22.33 ± 9.35                                   | 25.10 ± 7.84               | 26.87 ± 8.25               | <b>&lt;0.01</b>  |
| Body mass index**, kg/m <sup>2</sup> – mean±SD                 | 24.61 ± 6.60  | 24.41 ± 5.40                                   | 24.08 ± 5.11               | 25.98 ± 11.37              | <b>0.02</b>      |
| Trimester of pregnancy at the time of survey completion – n(%) |               |                                                |                            |                            |                  |
| 1 <sup>st</sup> trimester                                      | 72 (14.85%)   | 66 (17.14%)                                    | 2 (6.45%)                  | 4 (5.80%)                  |                  |
| 2 <sup>nd</sup> trimester                                      | 184 (37.94%)  | 149 (38.70%)                                   | 12 (38.71%)                | 23 (33.33%)                |                  |
| 3 <sup>rd</sup> trimester                                      | 229 (47.21%)  | 170 (44.16%)                                   | 17 (54.84%)                | 42 (60.87%)                | <b>0.023</b>     |
| Received influenza vaccine in 2020-2021 – n(%)                 | 182 (37.53%)  | 164 (42.60%)                                   | 7 (22.58%)                 | 11(15.94%)                 | <b>&lt;0.001</b> |
| Healthcare professional ensuring pregnancy follow-up*** – n(%) |               |                                                |                            |                            |                  |
| Family physician                                               | 152 (31.34%)  | 126 (31.90%)                                   | 6 (19.35%)                 | 20 (28.99%)                |                  |
| Obstetrician                                                   | 310 (63.92%)  | 241 (61.01%)                                   | 22 (70.97%)                | 47 (68.12%)                |                  |
| Midwife                                                        | 46 (9.48%)    | 35 (8.86%)                                     | 4 (12.90%)                 | 7 (10.14%)                 |                  |
| Nurse Practitioner                                             | 28 (5.73%)    | 23 (5.82%)                                     | 1 (3.23%)                  | 4 (5.80%)                  |                  |
| Years of education - mean±SD                                   | 17.20±3.86    | 17.65 ± 3.60                                   | 16.02 ± 4.40               | 14.67 ± 5.17               | <b>&lt;0.001</b> |
| Employment status – n(%)                                       |               |                                                |                            |                            |                  |
| Employed                                                       | 368 (75.88%)  | 293 (76.10%)                                   | 26 (83.87%)                | 49 (71.01%)                |                  |
| Self-employed                                                  | 42 (8.66%)    | 39 (10.13%)                                    | -                          | 3 (4.35%)                  |                  |
| Student or Intern                                              | 32 (6.60%)    | 23 (5.97%)                                     | 3 (9.68%)                  | 6 (8.70%)                  |                  |
| Unemployed                                                     | 11 (2.27%)    | 6 (1.56%)                                      | 1 (3.23%)                  | 4 (5.80%)                  |                  |
| On welfare                                                     | 18 (3.71%)    | 16 (4.16%)                                     | -                          | 2 (2.90%)                  |                  |
| Prefer not to answer                                           | 14 (2.89%)    | 7 (1.82%)                                      | 1 (3.23%)                  | 5 (7.25%)                  | -                |
| Ethnic background                                              |               |                                                |                            |                            |                  |
| Aboriginal (North American Indians, Métis or Inuit [Inuk])     | 2 (0.41%)     | 2 (0.52%)                                      | -                          | -                          |                  |
| Asian                                                          | 9 (1.86%)     | 4 (1.04%)                                      | 1 (3.23%)                  | 4 (5.80%)                  |                  |
| Black                                                          | 6 (1.24%)     | 6 (1.56%)                                      | -                          | -                          |                  |
| Caucasian/white                                                | 434 (89.48%)  | 354 (91.95%)                                   | 27 (87.10%)                | 53 (76.81%)                |                  |
| Hispanic                                                       | 13 (2.68%)    | 9 (2.34%)                                      | 2 (6.45%)                  | 2 (2.90%)                  |                  |
| Other                                                          | 12 (2.47%)    | 6 (1.56%)                                      | -                          | 6 (8.70%)                  |                  |
| Prefer not to answer                                           | 9 (1.86%)     | 4 (1.04%)                                      | 1 (3.20%)                  | 4 (5.80%)                  | -                |
| Living situation                                               |               |                                                |                            |                            |                  |
| Living alone or single mother                                  | 8 (1.65%)     | 6 (1.56%)                                      | 1 (3.23%)                  | 1 (1.45%)                  |                  |
| Living with a partner or married                               | 470 (96.91%)  | 374 (97.14%)                                   | 30 (96.77%)                | 66 (95.65%)                |                  |
| Living with parents or family                                  | 7 (1.44%)     | 5 (1.30%)                                      | -                          | 2 (2.90%)                  | -                |
| Area of residence                                              |               |                                                |                            |                            |                  |
| Urban                                                          | 214 (44.12%)  | 174 (45.19%)                                   | 11 (35.48%)                | 29 (42.03%)                |                  |
| Suburban                                                       | 211 (43.51%)  | 167 (43.38%)                                   | 18 (58.06%)                | 26 (37.68%)                |                  |
| Rural                                                          | 60 (12.37%)   | 44 (11.43%)                                    | 2 (6.45%)                  | 14 (20.29%)                | <b>0.12</b>      |
| Household income, CAD                                          |               |                                                |                            |                            |                  |
| <\$60,000                                                      | 53 (10.93%)   | 29 (7.53%)                                     | 6 (19.35%)                 | 18 (26.09%)                |                  |
| \$60,001-\$90,000                                              | 68 (14.02%)   | 55 (14.29%)                                    | 2 (6.45%)                  | 11 (15.94%)                |                  |
| \$90,001-\$120,000                                             | 103 (21.24%)  | 82 (21.30%)                                    | 7 (22.58%)                 | 14 (20.29%)                |                  |
| \$120,001-\$150,000                                            | 85 (17.53%)   | 68 (17.66%)                                    | 7 (22.58%)                 | 10 (14.49%)                |                  |
| >\$150,001                                                     | 147 (30.31%)  | 132 (34.29%)                                   | 7 (22.58%)                 | 8 (11.59%)                 |                  |
| Prefer not to answer                                           | 29 (5.98%)    | 19 (4.94%)                                     | 2 (6.45%)                  | 8 (11.59%)                 | <b>&lt;0.001</b> |

Legend: CAD – Canadian dollar, SD – standard deviation.

\* P values compare the three vaccination status categories and were considered significant if they were <0.05. \*\* Measured using pre-pregnancy weight. \*\*\*Not mutually exclusive categories.

**Figure 2 – Personal knowledge assessment of COVID-19 stratified by vaccination/vaccination intention status.**

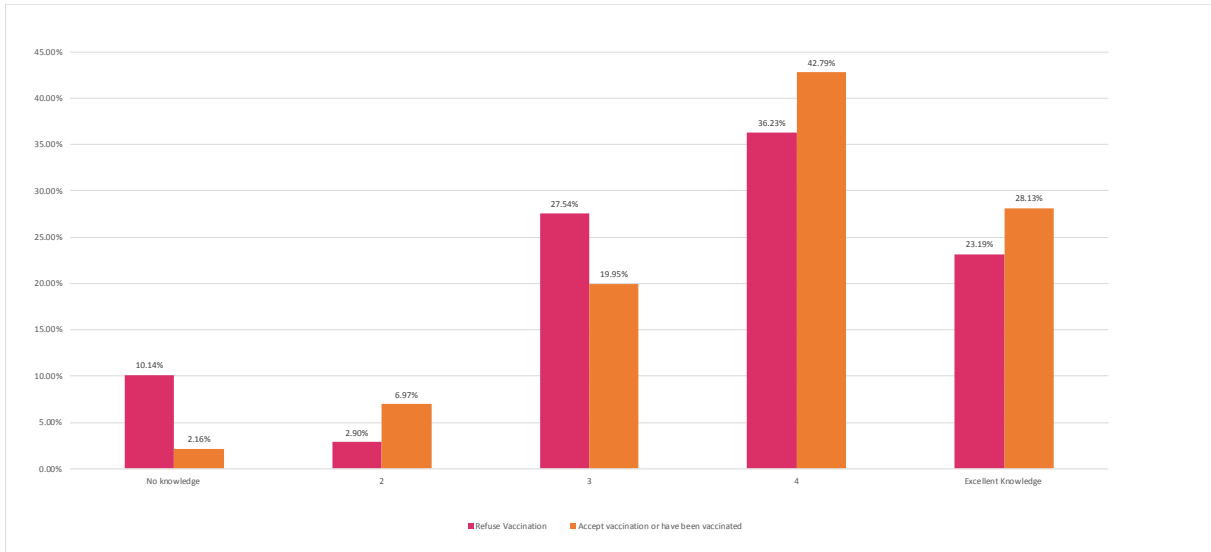

**A. Personal knowledge assessment of COVID-19 severity in pregnancy stratified by vaccination/vaccination intention status.**

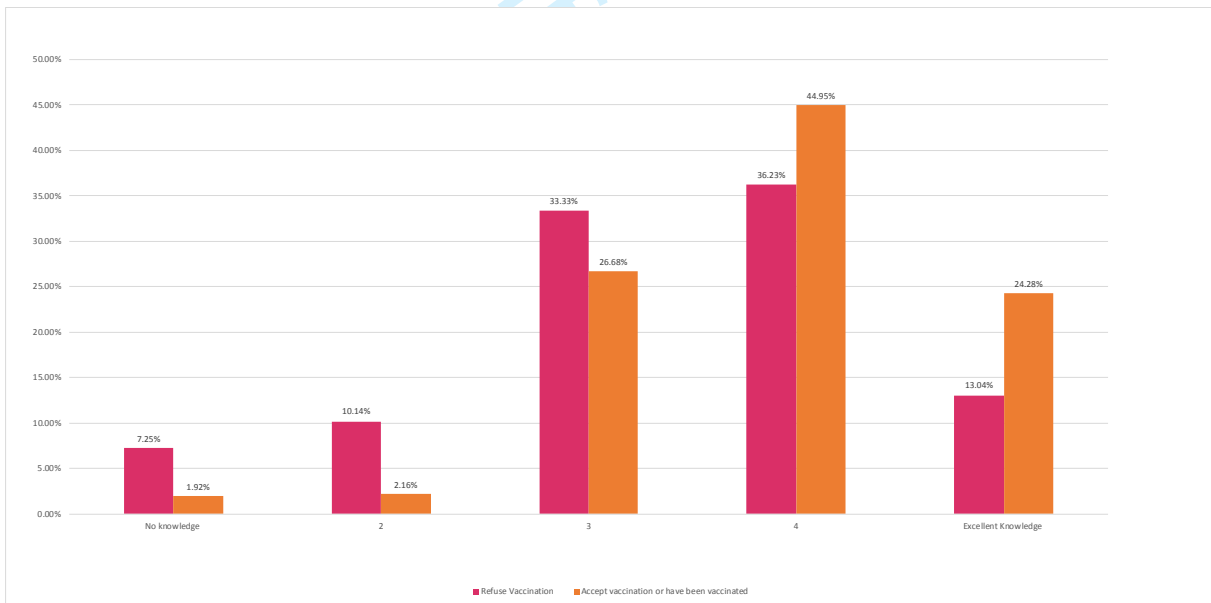

**B. Personal knowledge assessment of COVID-19 vaccination in general stratified by vaccination/vaccination intention status.**



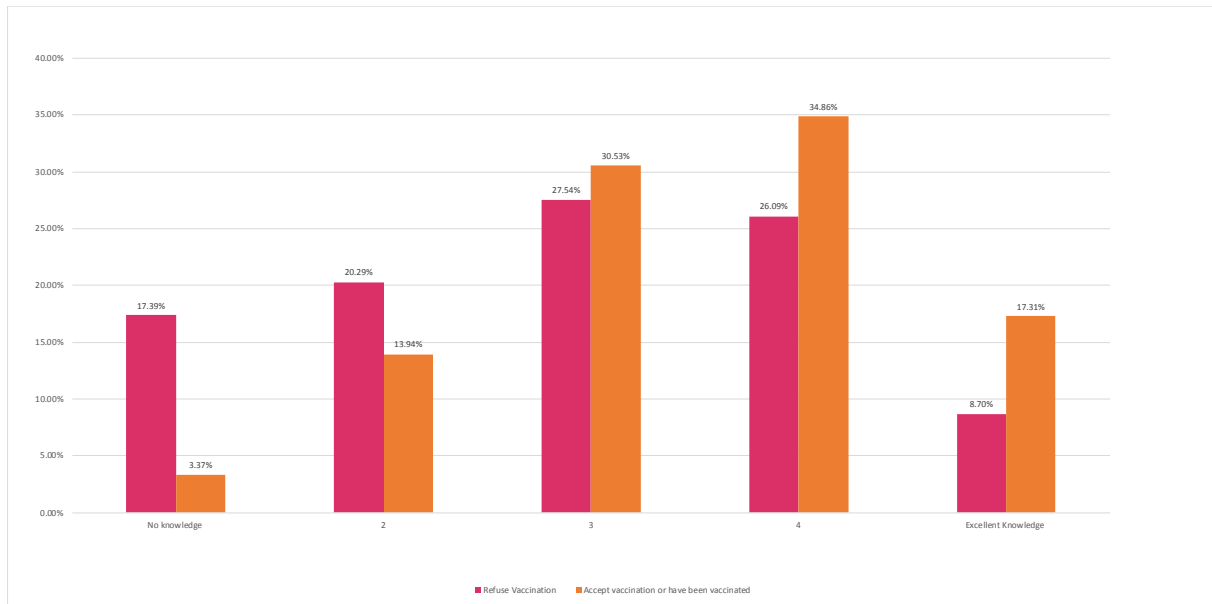

**C. Personal knowledge assessment of COVID-19 vaccination in pregnancy stratified by vaccination/vaccination intention status.**

Confidential

**Table 2. Personal experience with COVID-19**

|                                                                                | Vaccination or intention to vaccinate n=416 |                            | Refuse vaccination<br>n=69 | P-<br>value* |
|--------------------------------------------------------------------------------|---------------------------------------------|----------------------------|----------------------------|--------------|
|                                                                                | Vaccinated<br>n=385                         | Accept vaccination<br>n=31 |                            |              |
| Tested for COVID-19 – n(%)                                                     | 235 (61.04%)                                | 18 (58.06%)                | 35 (50.72%)                | 0.27         |
| <i>Prevalence of Negative test</i>                                             | 217 (56.36%)                                | 15 (48.39%)                | 32 (40.38%)                | 0.24         |
| <i>Prevalence of COVID-19</i>                                                  | 18 (4.68%)                                  | 3 (9.68%)                  | 3 (4.35%)                  | 0.45         |
| <i>Prevalence of positivity among those tested</i>                             | 18 (7.66%)                                  | 3 (16.67%)                 | 3 (8.57%)                  | 0.41         |
| Number of immediate family members infected with COVID-19 – n(%)               |                                             |                            |                            |              |
| <i>None</i>                                                                    | 343 (89.09%)                                | 28 (90.32%)                | 61 (88.41%)                |              |
| <i>1-5</i>                                                                     | 42 (10.91%)                                 | 3 (9.68%)                  | 4 (11.59%)                 | 0.50         |
| Number of extended family members and/or friends infected with COVID-19 – n(%) |                                             |                            |                            |              |
| <i>None</i>                                                                    | 195 (50.86%)                                | 16 (51.61%)                | 33 (47.38%)                |              |
| <i>1-5</i>                                                                     | 165 (42.86%)                                | 12 (38.71%)                | 35 (50.72%)                |              |
| <i>6 or more</i>                                                               | 25 (6.48%)                                  | 3 (9.68%)                  | 1 (1.45%)                  | 0.36         |

\* P values compare the three vaccination status categories and were considered significant if they were <0.05.

Confidential

**Table 3.** Predictors of vaccination status or intention to be vaccinated.

|                                                                | Crude Odds Ratio (95%CI) | Adjusted* Odds Ratio (95%CI) |
|----------------------------------------------------------------|--------------------------|------------------------------|
| Received an influenza vaccine within the last flu season       | 3.07 (1.68-6.01)         | 3.03 (1.56-6.33)             |
| Area of residence                                              |                          |                              |
| <i>Rural</i>                                                   | 1.00                     | 1.00                         |
| <i>Suburban</i>                                                | 2.56 (1.19-5.35)         | 2.84 (1.20-6.65)             |
| <i>Urban</i>                                                   | 1.71 (0.82-3.40)         | 1.51 (0.67-3.28)             |
| Employment status                                              |                          |                              |
| <i>On welfare or unemployed</i>                                | 1.00                     | 1.00                         |
| <i>Employed</i>                                                | 3.75 (1.89-7.24)         | 3.66 (1.67-7.81)             |
| Self-assessment of knowledge of COVID-19 severity in pregnancy |                          |                              |
| <i>No knowledge</i>                                            | 1.00                     | 1.00                         |
| 2                                                              | 3.40 (1.09-10.31)        | 2.60 (0.76-8.42)             |
| 3                                                              | 5.57 (1.84-16.31)        | 3.73 (1.12-11.70)            |
| 4                                                              | 5.64 (1.80-17.35)        | 3.72 (1.06-12.42)            |
| <i>Very Knowledgeable</i>                                      | 11.28 (2.27-85.57)       | 8.13 (1.50-64.77)            |
| Self-assessment of knowledge of COVID-19 vaccine in general    |                          |                              |
| <i>No knowledge</i>                                            | 1.00                     | 1.00                         |
| 2                                                              | 0.80 (0.17-3.57)         | 0.52 (0.08-2.81)             |
| 3                                                              | 3.01 (0.85-9.90)         | 1.40 (0.27-5.58)             |
| 4                                                              | 4.68 (1.33-15.17)        | 2.15 (0.43-8.50)             |
| <i>Very Knowledgeable</i>                                      | 7.01 (1.81-26.07)        | 2.94 (0.54-13.28)            |
| Self-assessment of knowledge of COVID-19 vaccine in pregnancy  |                          |                              |
| <i>No knowledge</i>                                            | 1.00                     | 1.00                         |
| 2                                                              | 3.55 (2.35-9.47)         | 2.39 (0.80-7.00)             |
| 3                                                              | 5.73 (2.30-14.36)        | 4.09 (1.45-11.29)            |
| 4                                                              | 6.90 (2.76-17.39)        | 4.47 (1.56-12.51)            |
| <i>Very Knowledgeable</i>                                      | 10.29 (3.43-34.12)       | 7.62 (2.19-28.71)            |

\*Adjusted for maternal age, pre-pregnancy body mass index, years of education as well as annual household income.

**Figure 3.** Reasons (%) provided for refusal among those refusing to get vaccinated (n=69).

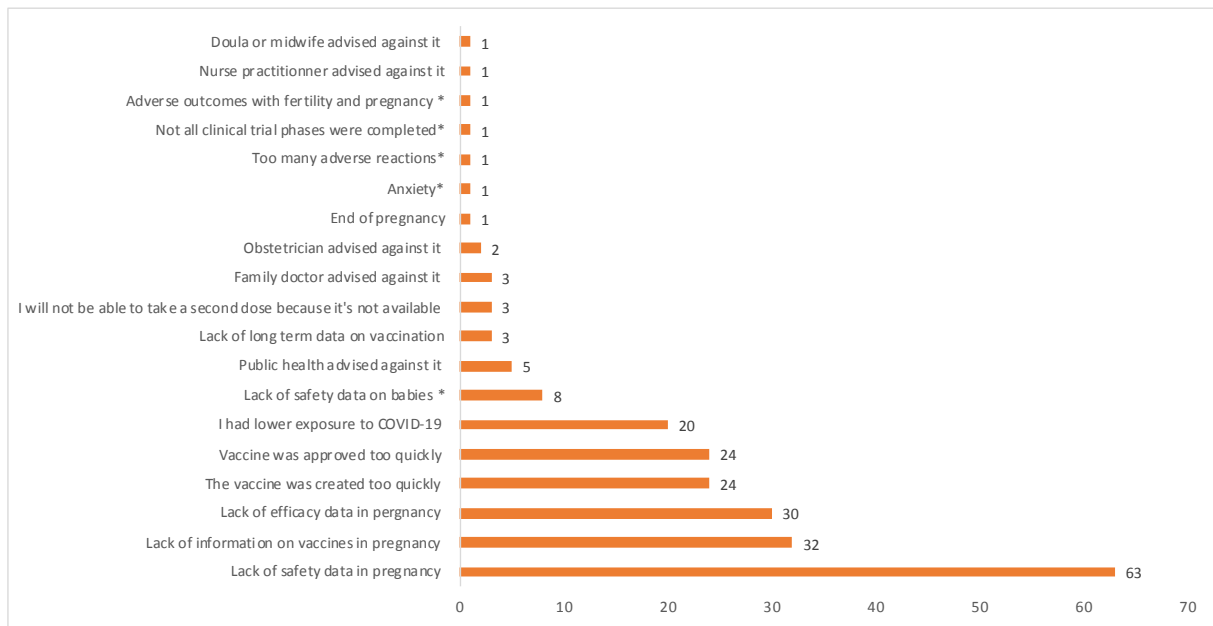

\* Reasons reported by participants in addition to those suggested.

**Supplementary Figure SF1.** Reported side effects among those vaccinated with the first and second dose (n=385).

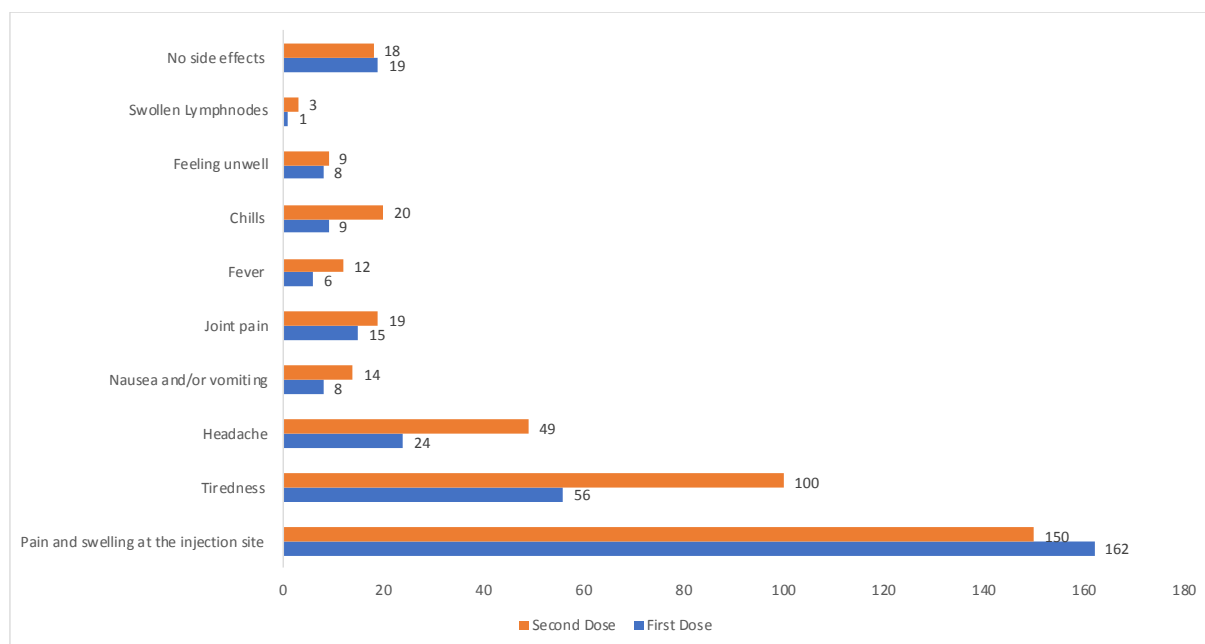

**Supplementary Table ST1.** Doses received among those vaccinated (n=385).

|                    | Pfizer/BioNTech (n=311) | Moderna (n=74) |
|--------------------|-------------------------|----------------|
| One dose received  | 154 (49.52%)            | 39 (52.70%)    |
| Two doses received | 157 (50.48%)            | 35 (47.30%)    |
